# Supplementary material for: Selection of anterior circulation acute stroke patients for mechanical thrombectomy
Source: Springer Nature journal article supplement (doi:10.1007/s00415-019-09454-2), 2019-07-03
Supplement: MOESM1 [file 16878844]

**Selection of anterior circulation acute stroke patients for mechanical thrombectomy**

Journal of Neurology

Fabrizio Sallustio MDa,b, Nicola Toschi PhDc, Alfredo Paolo Mascolo MDa, Federico Marrama MDa, Daniele Morosetti MDd, Valerio Da Ros MDd, Roberto Gandini MDd, Fana Alemseged MDa, Giacomo Koch PhDa,b, Marina Diomedi PhDa

a Stroke Center, Department of Systems Medicine, University of Tor Vergata, Viale Oxford 81, 00133, Rome, Italy;

b Santa Lucia Foundation, via Ardeatina 306, 00142, Rome, Italy;

c Department of Biomedicine and Prevention, University of Tor Vergata, via Montpellier 1, 00133, Rome, Italy;

d Department of Interventional Radiology, University of Tor Vergata, viale Oxford 81, Rome, Italy

e-mail address of the corresponding author: fsall75@gmail.com

**Supplementary table 1. Patients characteristics until and after 2014.**

| **Characteristic** | **2012-2014 (n=79)** | **2015-2017 (n=307)** | ***p*** |
| --- | --- | --- | --- |
| Age, mean±SD | 66.1±12.4 | 73.4±13.1 | .82 |
| Male sex, mean±SD | 42±53.2 | 117±38.1 | .02 |
| Onset NIHSSb, mean±SD | 17.9 ± 4.2 | 16.9 ± 5.2 | .22 |
| ASPECTc score, mean±SD | 7.97±1.9 | 7.99±1.9 | .96 |
| Good collateral flow, n(%) | 49 (62) | 209 (68.1) | .19 |
| TICI scale ≥2b, n(%) | 58 (73.4) | 232 (75.6) | .31 |
| 3-months mRSa≤2, n(%) | 31 (39.2) | 115 (37.5) | .43 |
| 3-months mortality, n(%) | 19 (24.1) | 98 (31.9) | .11 |

a modified Rankin Scale;

b National Institutes of Health Stroke Scale;

cAlberta Stroke Program Early CT Score;

d Thrombolysis in Cerebral Infarction scale;

g difference between onset and 24h NIHSS.
